# Supplementary material
Source: publisher figshare collection journal article supplement (https://sage.figshare.com/ndownloader/files/19037177)
Supplement: Supplementary file 1 [file 19037177]

## **Appendix 1. Interview Guide for the Healthcare Providers' Focus Groups**

- How do you view the idea that healthcare providers can help young people develop interdependency skills (asserting oneself in the social space, using healthcare services) and not only skills related to functional autonomy (self-care skills)?
- How should one adjust to the young people's level of development to allow him/her to gain the appropriate skills?
- What role should the parents be given during this period?
- How should sensitive or intimate questions be approached with young people?
- How could peer-educators be integrated to the transition processes?
- Which steps should be taken to optimise the continuity of care and the continuity of patient education between paediatric and adult care?
- How should a young person be trained to use a new healthcare service?

## **Appendix 2. Interview Guide for the Parents' Focus Groups**

- Based on your experience, what essential elements are needed to experience an optimal transition?
- How do you view the idea that healthcare providers can help young people develop interdependency skills (asserting oneself in the social space, using healthcare services) and not only skills related to functional autonomy (self-care skills)?
- What role should the parents be given during this period?
- How should sensitive or intimate questions be approached with young people?
- How do you proceed to make young people more autonomous during this period?
